# Supplementary material
Source: MDPI journal article supplement (https://www.mdpi.com/search?q=antibiotics-09-00753)
Supplement: s001 [file antibiotics-09-00753-s001.pdf]

## Supplementary Materials

# Simplicilones A and B isolated from the endophytic fungus *Simplicillium subtropicum* SPC3

**Elodie Gisele M. Anoumedem**<sup>1</sup>, **Bel Youssef G. Mountessou**<sup>1</sup>, **Simeon F. Kouam**<sup>1,\*</sup>, **Abolfazl Narmani**<sup>2,3</sup> and **Frank Surup**<sup>2,4,\*</sup>

<sup>1</sup> Department of Chemistry, Higher Teacher Training College, University of Yaoundé I, P.O. Box 47, Yaoundé, Cameroon; kfogue@yahoo.com; gisele.elodie@yahoo.com (EGMA); mountessou@yahoo.com (BYGM)

<sup>2</sup> Microbial Drugs Department, Helmholtz-Centre for Infection Research (HZI), Inhoffenstr. 7, 38124 Braunschweig, Germany; frank.surup@helmholtz-hzi.de (FS)

<sup>3</sup> Department of Plant Protection, Faculty of Agriculture, University of Tabriz, Tabriz, Iran

<sup>4</sup> German Centre for Infection Research (DZIF), partner site Hannover-Braunschweig, 38124 Braunschweig, Germany

\* Correspondence: marc.stadler@helmholtz-hzi.de (M.S.); kfogue@yahoo.com (S.F.K.)

## Contents

### Molecular phylogenetic analysis

**Table S1:** Results of the megablast search analysis at NCBI's GenBank nucleotide database for strain SPC3

**Figure S1:** Consensus phylogram (75% majority rule) of 1002 trees resulting from a Bayesian analysis of ITS sequence alignment using MrBayes v. 3.2.2 of various *Simplicilium* species. The scale bar indicates 0.04 expected changes per site. The tree was rooted to *Verticillium fungicola* var. *fungicola* CBS 992.69 (EF641889.1)

**Figure S2:** HRESI-Mass spectrum of simplicilone A (1)

**Figure S3:** <sup>1</sup>H NMR (500 MHz, CDCl<sub>3</sub>) spectrum of simplicilone A (1)

**Figure S4:** <sup>13</sup>C NMR (500 MHz, CDCl<sub>3</sub>) spectrum of simplicilone A (1)

**Figure S5:** HSQC spectrum of simplicilone A (1)

**Figure S6:** HMBC spectrum of simplicilone A (1)

**Figure S7:** ROESY spectrum of simplicilone A (1)

**Figure S8:** HRESI-Mass spectrum of simplicilone B (2)

**Figure S9:** <sup>1</sup>H NMR (500 MHz, CDCl<sub>3</sub>) spectrum of simplicilone B (2)

**Figure S10:** <sup>13</sup>C NMR (500 MHz, CDCl<sub>3</sub>) spectrum of simplicilone B (2)

**Figure S11:** HSQC spectrum of simplicilone B (2)

**Figure S12:** HMBC spectrum of simplicilone B (2)

**Figure S13:** COSY spectrum of simplicilone B (2)

**Figure S14:** ROESY spectrum of simplicilone B (2)

### **Molecular phylogenetic analysis**

Megablast search analysis at NCBI's GenBank nucleotide database showed high similarity with reference sequence of *Simplicillium* species from GenBank (Table S1). A phylogeny inferred based on ITS-rDNA sequence obtained in this study together with sequence data from GenBank. The final sequence alignment of the ITS-rDNA sequence comprising 20 internal taxa had 612 characters and 140 unique site patterns. *Verticillium fungicola* var. *fungicola* CBS 992.69 (EF641889.1) served as the outgroup taxon. Bayesian analyses were performed using the best-fitting substitution model (K80+I+G) and resulted in 1002 generations. After discarding the first 25% of generations as burn-in, the remaining 752 (75%) generations were used to calculate the consensus Bayesian tree and posterior probabilities. Results indicated that the isolate used in this study clustered with *Simplicillium subtropicum* (Figure S1).

Table S1: Results of the megablast search analysis at NCBI's GenBank nucleotide database for strain SPC3.

| <b>Description</b>                                | <b>Max Score</b> | <b>Total Score</b> | <b>Query Cover</b> | <b>E value</b> | <b>Per. Ident</b> | <b>Accession</b> |
|---------------------------------------------------|------------------|--------------------|--------------------|----------------|-------------------|------------------|
| <i>Simplicillium</i> sp. strain DTO 391-A3        | 1123             | 1123               | 100%               | 0              | 99.51%            | MN788113.1       |
| <i>Simplicillium</i> sp. H198                     | 1123             | 1123               | 100%               | 0              | 99.51%            | KP184324.1       |
| <i>Simplicillium</i> sp. H41                      | 1118             | 1118               | 99%                | 0              | 99.51%            | KT318874.1       |
| <i>Simplicillium</i> sp. H133                     | 1105             | 1105               | 98%                | 0              | 99.51%            | KP184319.1       |
| <i>Simplicillium</i> sp. H174                     | 1103             | 1103               | 98%                | 0              | 99.51%            | KP184323.1       |
| <i>Simplicillium</i> sp. strain H261              | 1099             | 1099               | 97%                | 0              | 99.50%            | KX020567.1       |
| <i>Simplicillium</i> sp. strain H168              | 1099             | 1099               | 97%                | 0              | 99.50%            | KX020563.1       |
| <i>Simplicillium</i> sp. H61                      | 1099             | 1099               | 97%                | 0              | 99.50%            | KP184314.1       |
| <i>Simplicillium</i> sp. H161                     | 1096             | 1096               | 97%                | 0              | 99.50%            | KP184321.1       |
| <i>Simplicillium</i> sp. H63                      | 1096             | 1096               | 97%                | 0              | 99.50%            | KP184316.1       |
| <i>Simplicillium</i> sp.                          | 1086             | 1086               | 96%                | 0              | 99.50%            | MT635320.1       |
| <i>Simplicillium</i> sp. H44                      | 1051             | 1051               | 93%                | 0              | 99.48%            | KP184312.1       |
| <i>Ascomycota</i> sp. isolate F-20                | 1029             | 1029               | 91%                | 0              | 99.47%            | MT610994.1       |
| <i>Simplicillium</i> sp. strain MF44              | 990              | 990                | 88%                | 0              | 99.45%            | KY397989.1       |
| <i>Simplicillium</i> sp. M-27                     | 1074             | 1074               | 95%                | 0              | 99.33%            | JQ422627.1       |
| <i>Simplicillium</i> sp. H36                      | 1053             | 1053               | 94%                | 0              | 99.31%            | KP184311.1       |
| <i>Simplicillium</i> sp. JCM 39053                | 1033             | 1033               | 92%                | 0              | 99.30%            | LC496873.1       |
| <i>Simplicillium</i> sp. JCM 39052                | 1033             | 1033               | 92%                | 0              | 99.30%            | LC496872.1       |
| Uncultured <i>Simplicillium</i> clone DZ_69       | 1026             | 1026               | 91%                | 0              | 99.30%            | KX214368.1       |
| Uncultured <i>Simplicillium</i> clone DZ_62       | 1026             | 1026               | 91%                | 0              | 99.30%            | KX214365.1       |
| <i>Simplicillium lanosoniveum</i> strain SIB15C01 | 994              | 994                | 89%                | 0              | 99.27%            | MK952446.1       |
| <i>Simplicillium lanosoniveum</i> strain SiIGD65  | 994              | 994                | 89%                | 0              | 99.27%            | MH483712.1       |
| <i>Simplicillium</i> sp. strain SZWL8             | 1042             | 1042               | 94%                | 0              | 99.14%            | MH186014.1       |
| <i>Simplicillium</i> sp. isolate SCSIO41513       | 1027             | 1027               | 92%                | 0              | 99.13%            | MT436779.1       |
| <i>Simplicillium subtropicum</i> strain SsB17A02  | 1003             | 1003               | 90%                | 0              | 99.11%            | MK952451.        |

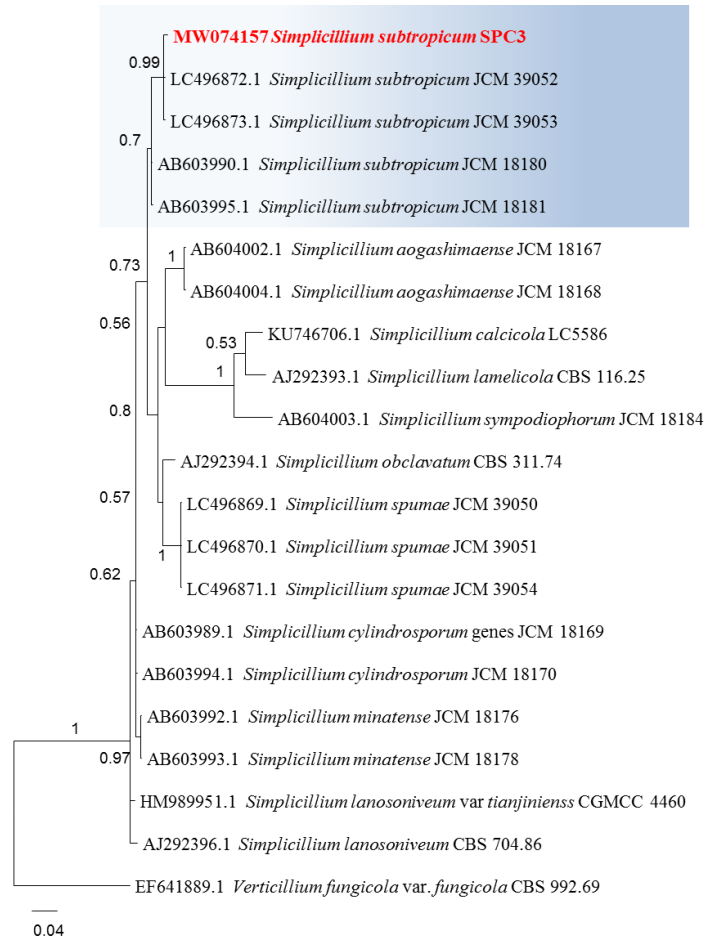

**Figure S1:** Consensus phylogram (75% majority rule) of 1002 trees resulting from a Bayesian analysis of ITS sequence alignment using MrBayes v. 3.2.2 of various *Simplicillium* species. The scale bar indicates 0.04 expected changes per site. The tree was rooted to *Verticillium fungicola* var. *fungicola* CBS 992.69 (EF641889.1).

**Table S2:** Minimum inhibitory concentrations (MIC) of 1–2. n.i.: no inhibition up to 66.7 µg/mL

| test organism                    | strain number | MIC [ $\mu\text{g}\times\text{mL}^{-1}$ ] |      |
|----------------------------------|---------------|-------------------------------------------|------|
|                                  |               | 1                                         | 2    |
| organism                         |               |                                           |      |
| <i>Bacillus subtilis</i>         | DSM 10        | n.i.                                      | n.i. |
| <i>Staphylococcus aureus</i>     | DSM 346       | n.i.                                      | n.i. |
| <i>Micrococcus luteus</i>        | DSM 1790      | n.i.                                      | n.i. |
| <i>Chromobacterium violaceum</i> | DSM 30191     | n.i.                                      | n.i. |
| <i>Escherichia coli</i>          | DSM 1116      | n.i.                                      | n.i. |
| <i>Pseudomonas aeruginosa</i>    | PA14          | n.i.                                      | n.i. |
| <i>Mycobacterium smegmatis</i>   | ATCC 700084   | n.i.                                      | n.i. |
| <i>Candida albicans</i>          | DSM 1665      | n.i.                                      | n.i. |
| <i>Schizosaccharomyces pombe</i> | DSM70572      | n.i.                                      | n.i. |
| <i>Mucor hiemalis</i>            | DSM 2656      | n.i.                                      | n.i. |
| <i>Pichia anomala</i>            | DSM 6766      | n.i.                                      | n.i. |
| <i>Rhodotorula glutinis</i>      | DSM 10134     | n.i.                                      | n.i. |

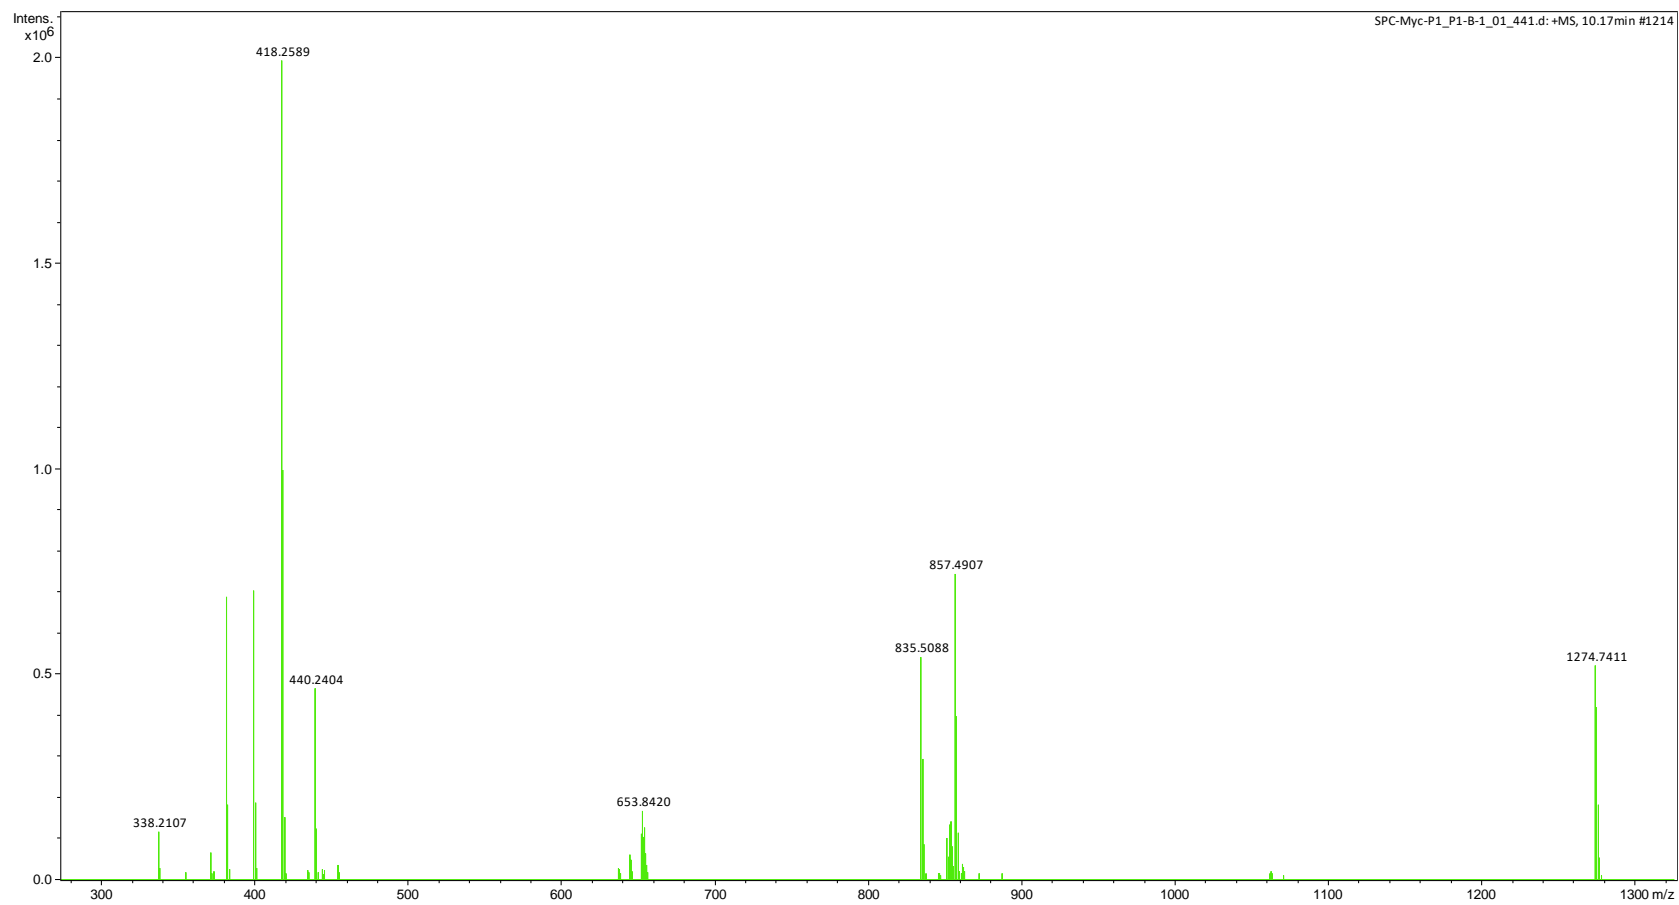

Figure S2: HRESI-Mass spectrum of simplicilone A (1)

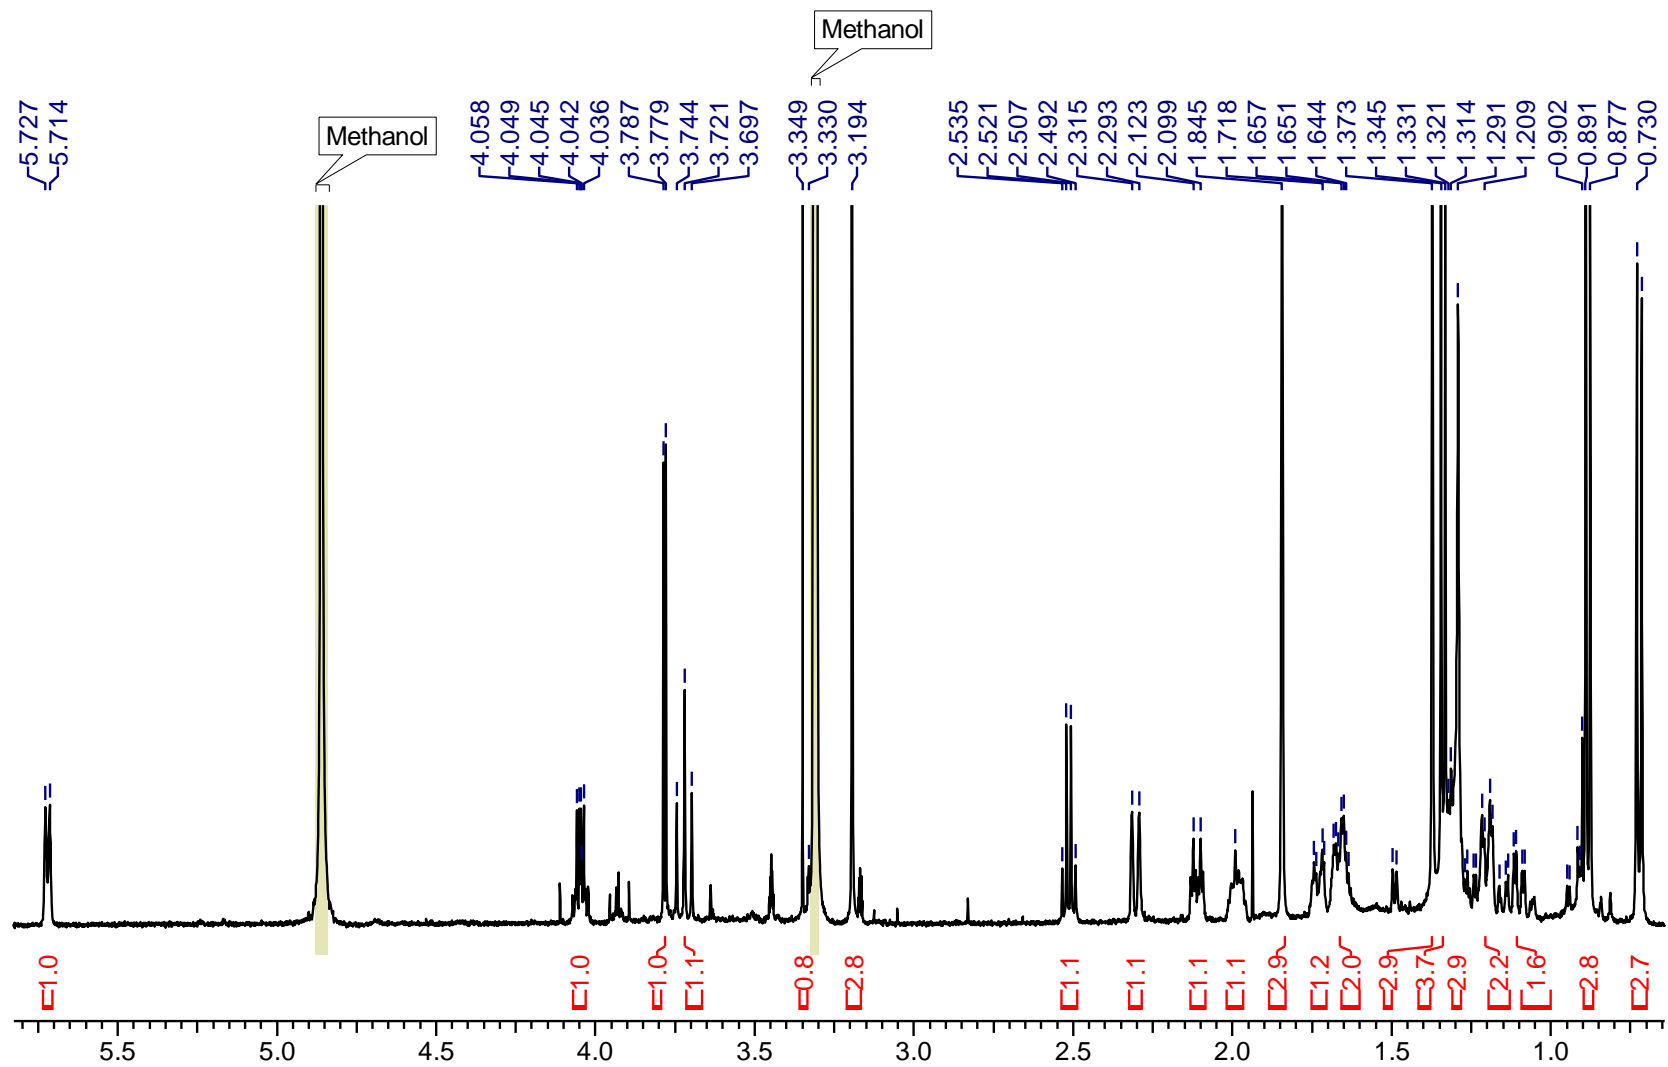

Figure S3:  $^1\text{H}$  NMR (500 MHz,  $\text{CDCl}_3$ ) spectrum of simplicilone A (1)



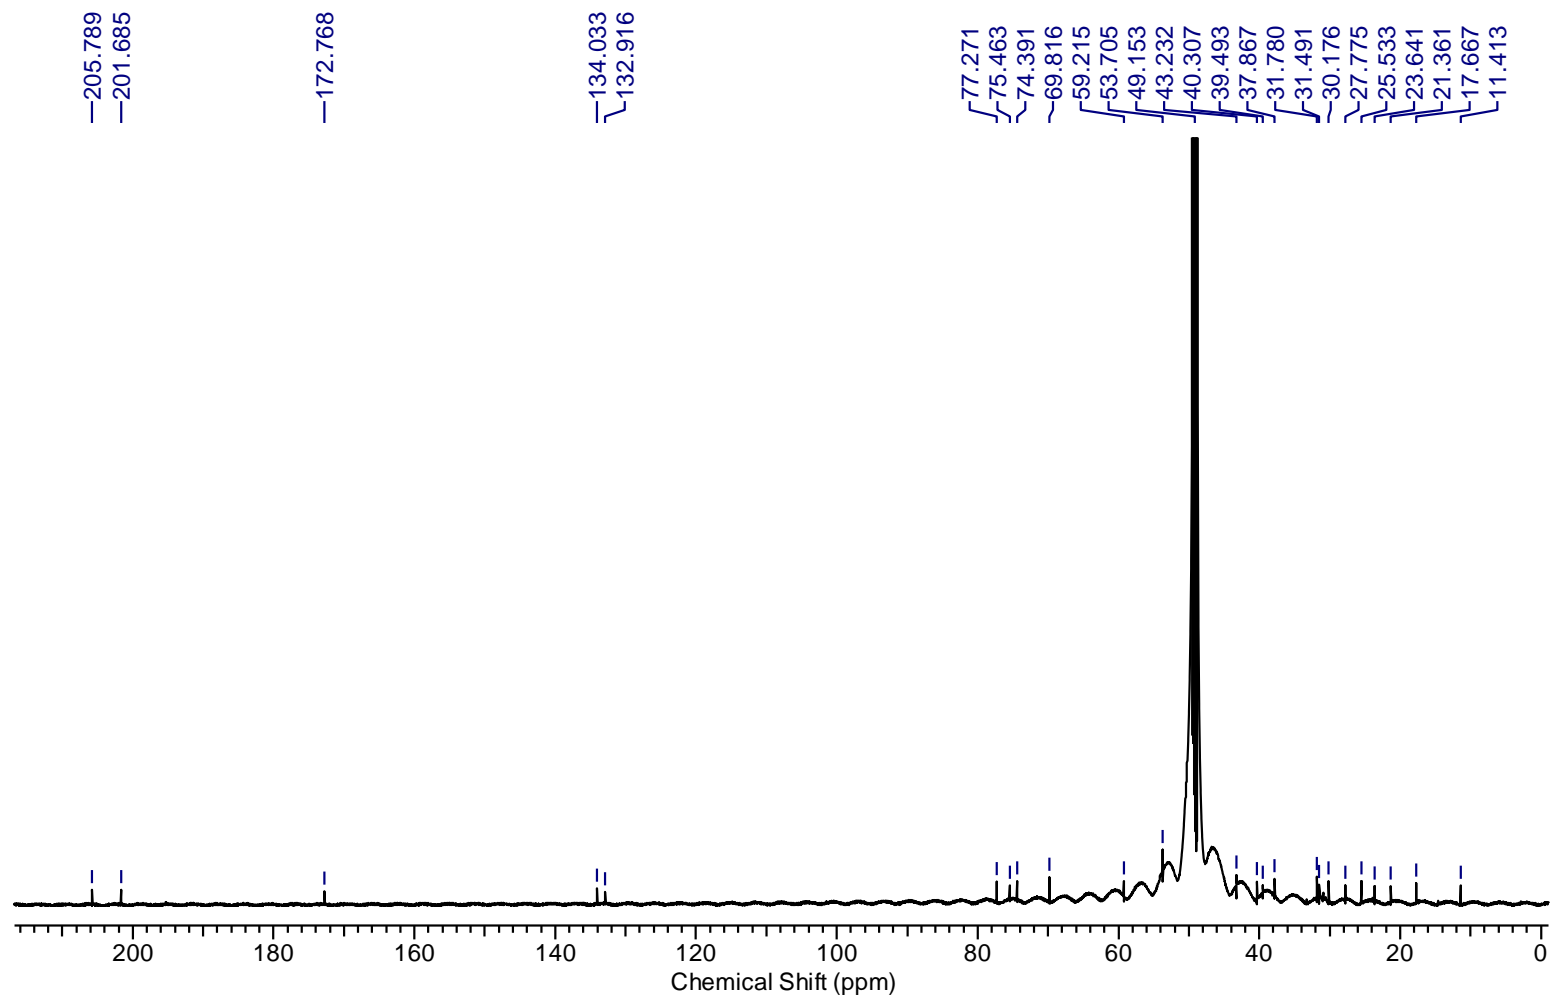

Figure S4: <sup>13</sup>C NMR (500 MHz, CDCl<sub>3</sub>) spectrum of simplicilone A (1)

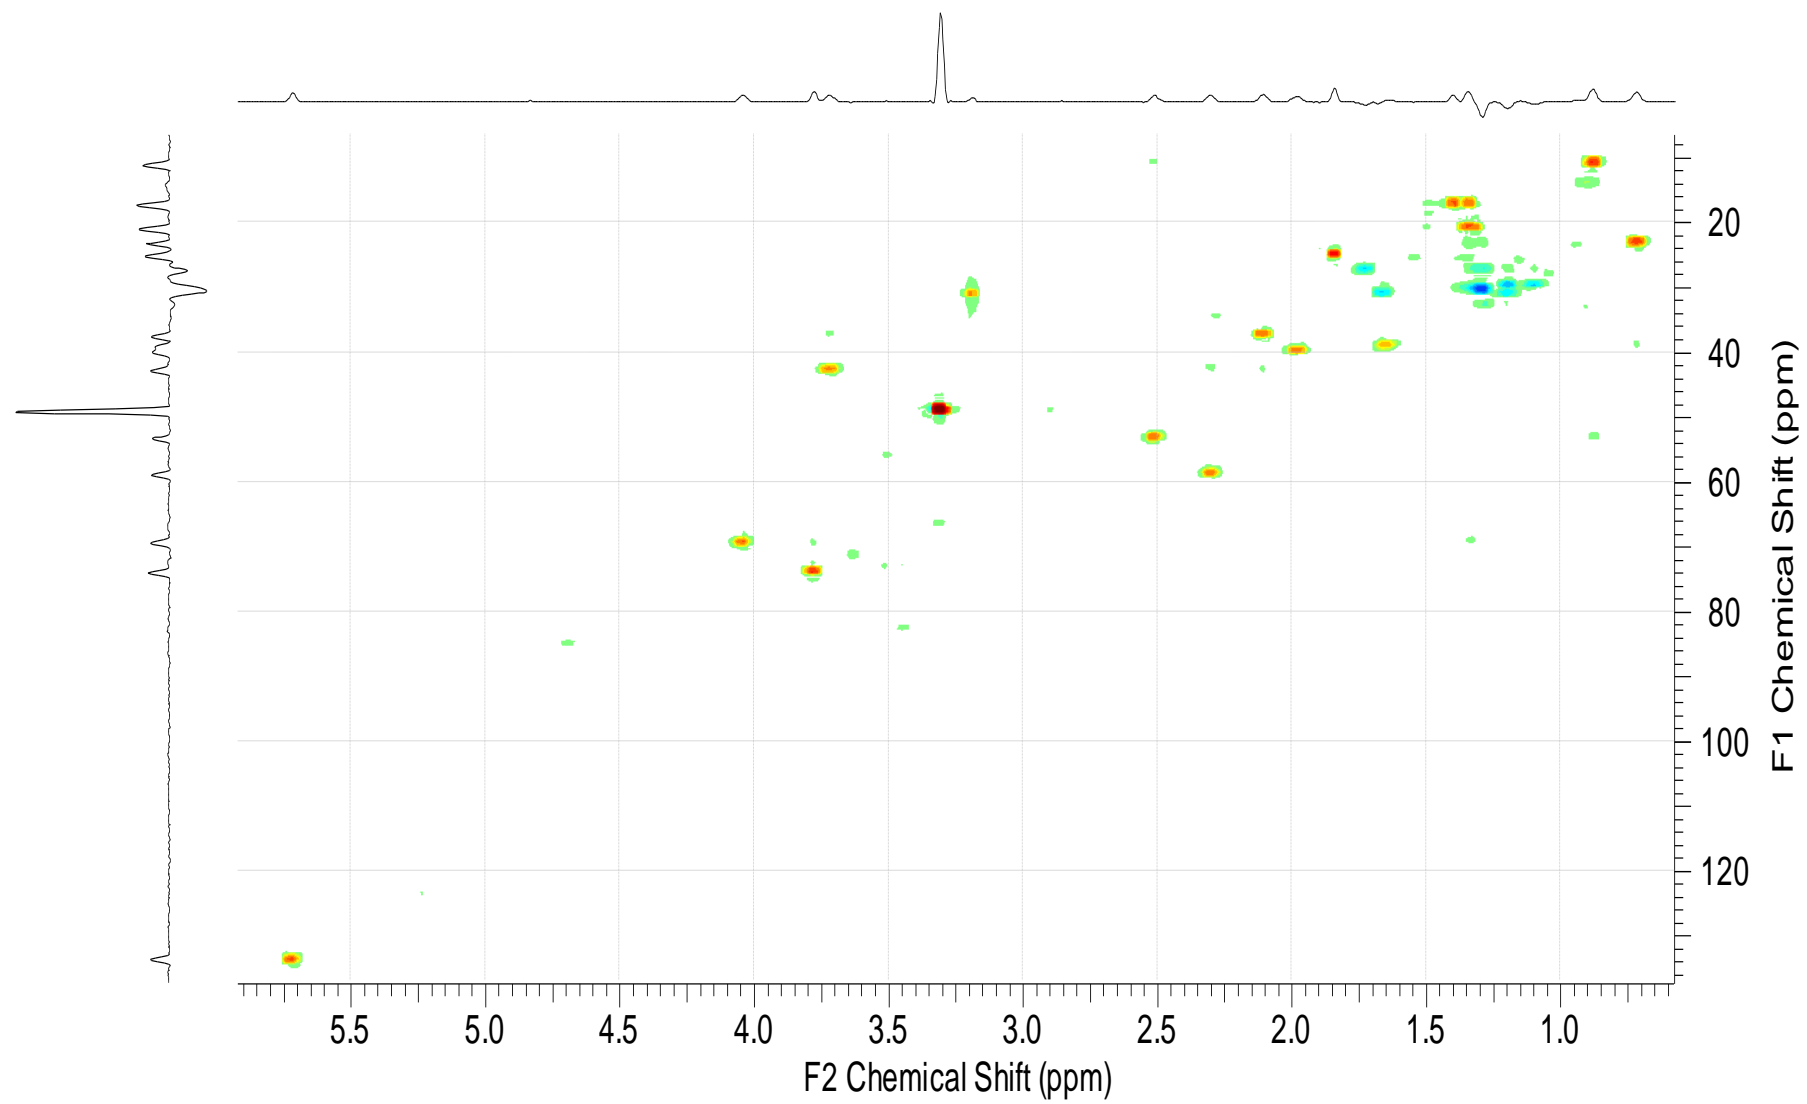

Figure S5: HSQC spectrum of simplicilone A (1)

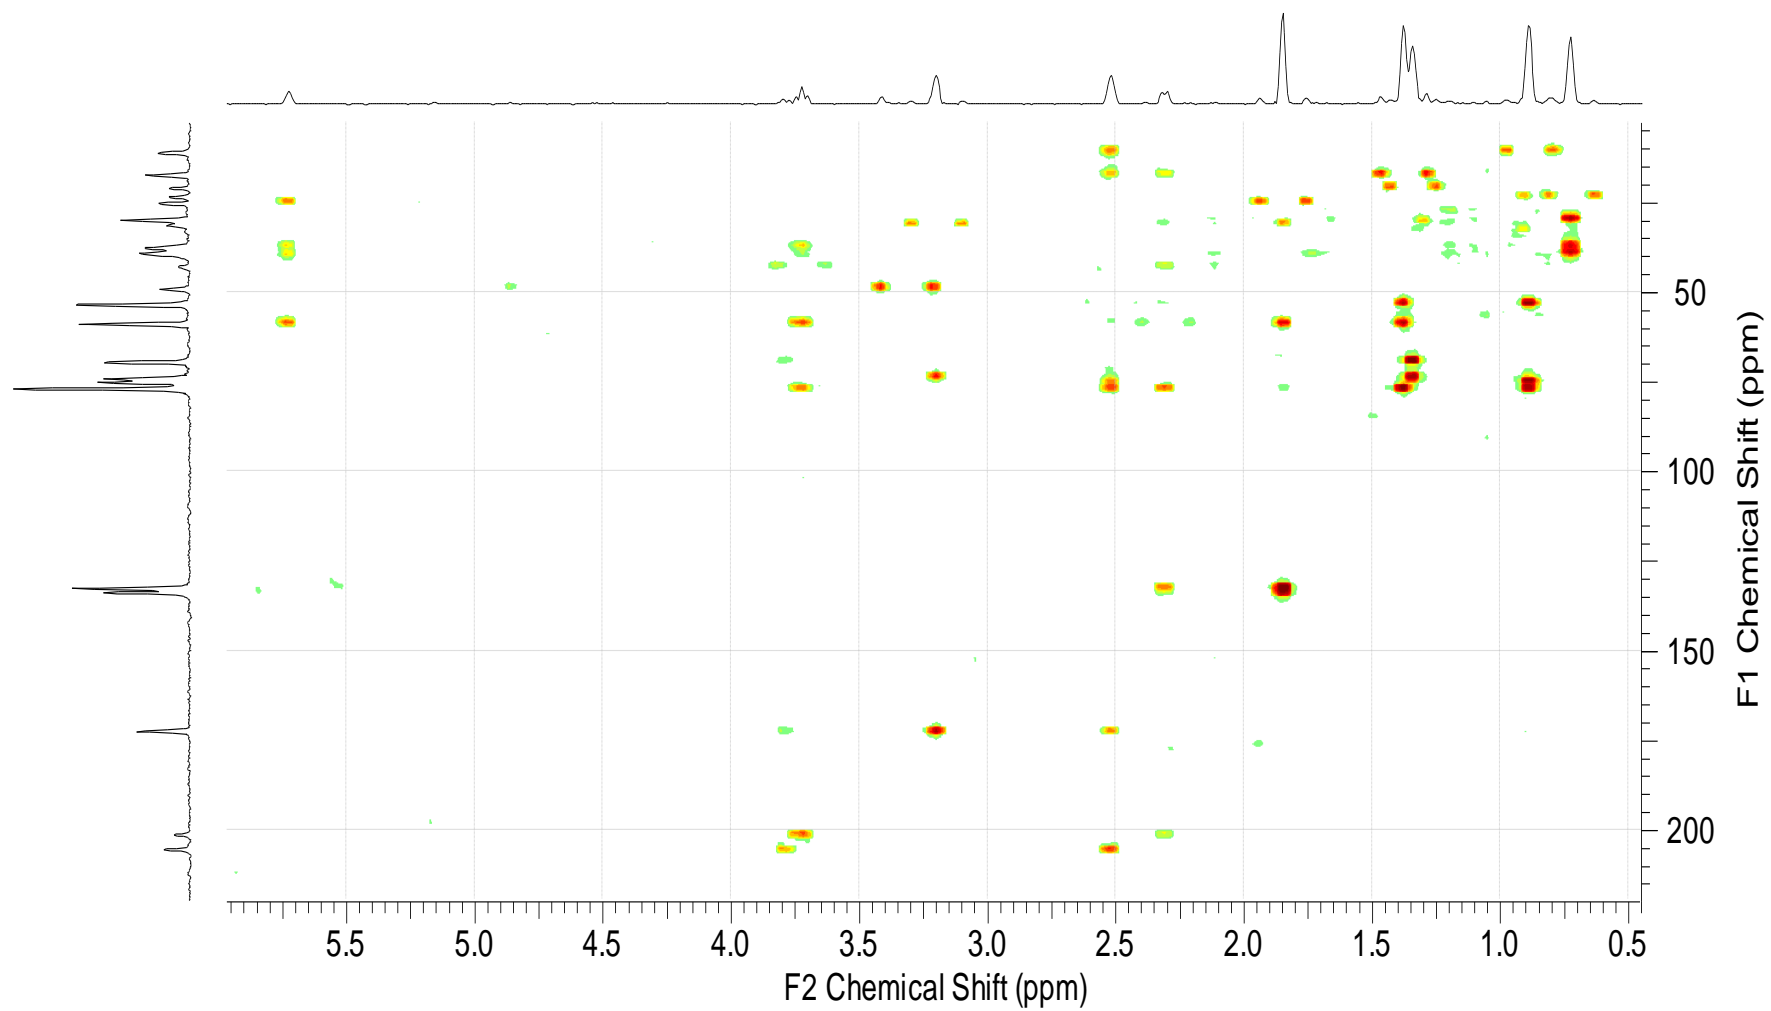

Figure S6: HMBC spectrum of simplicilone A (1)

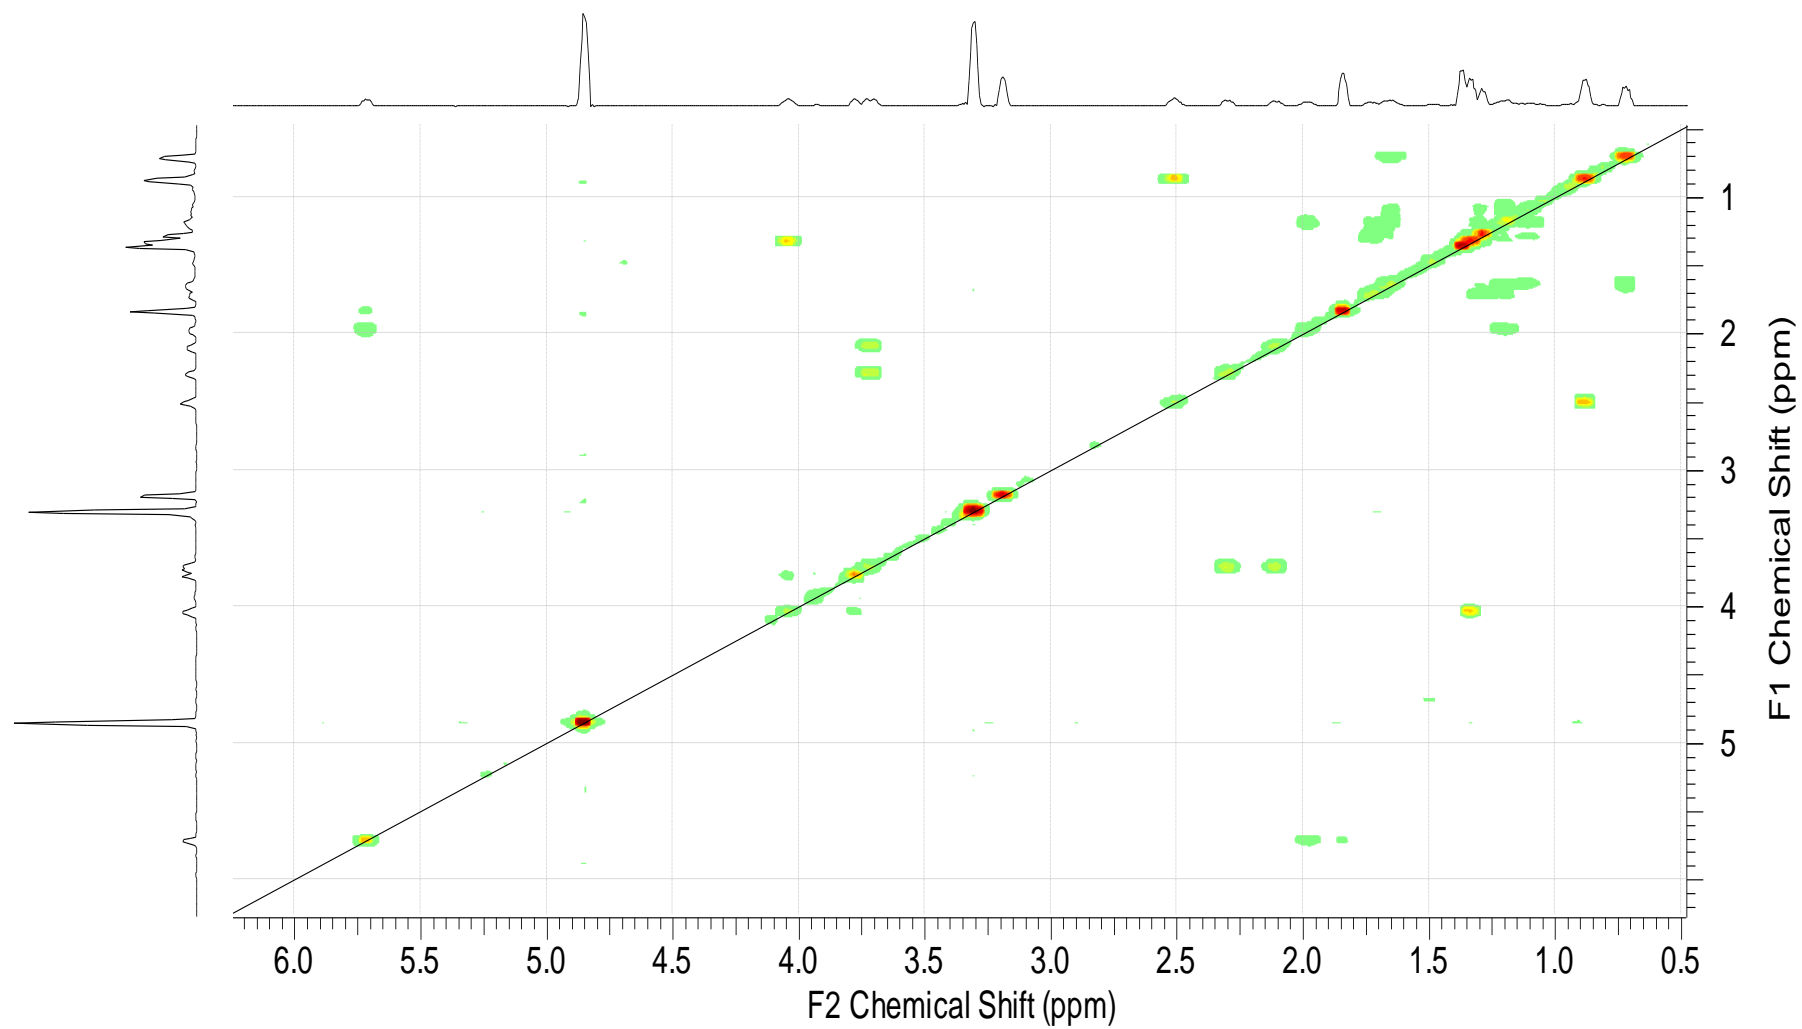

Figure S7: ROESY spectrum of simplicilone A (1)

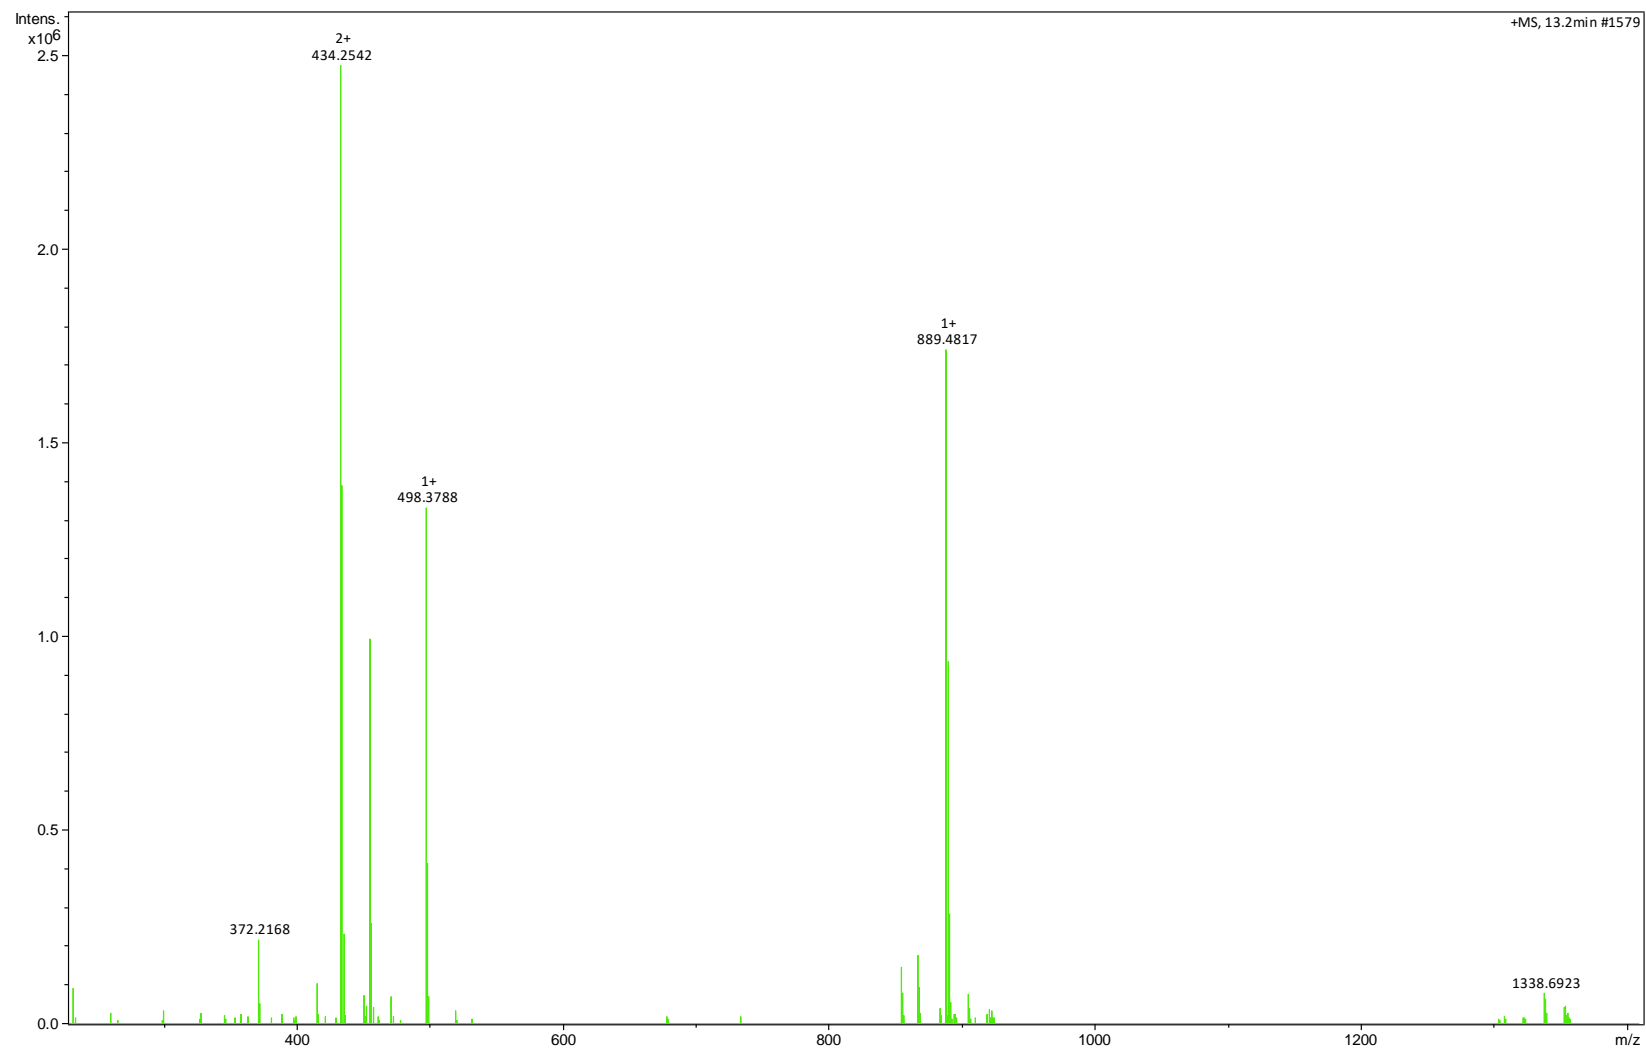

Figure S8: HRESI-Mass spectrum of simplicilone B (2)

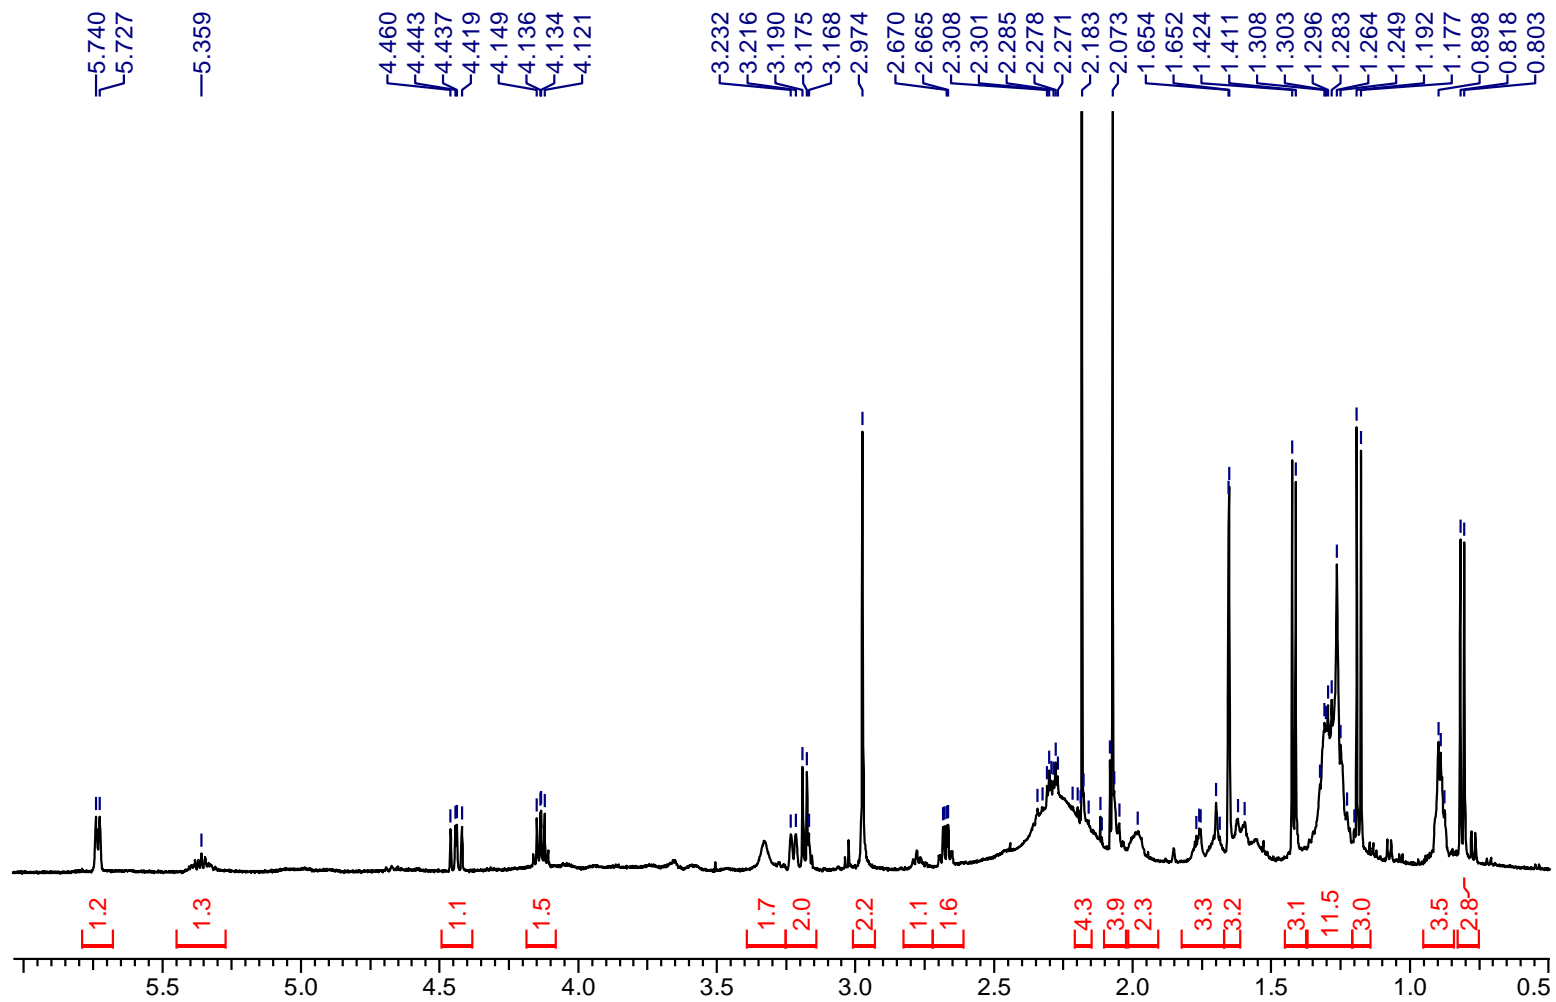

Figure S9: <sup>1</sup>H NMR (500 MHz, CDCl<sub>3</sub>) spectrum of simplicilone B (2)

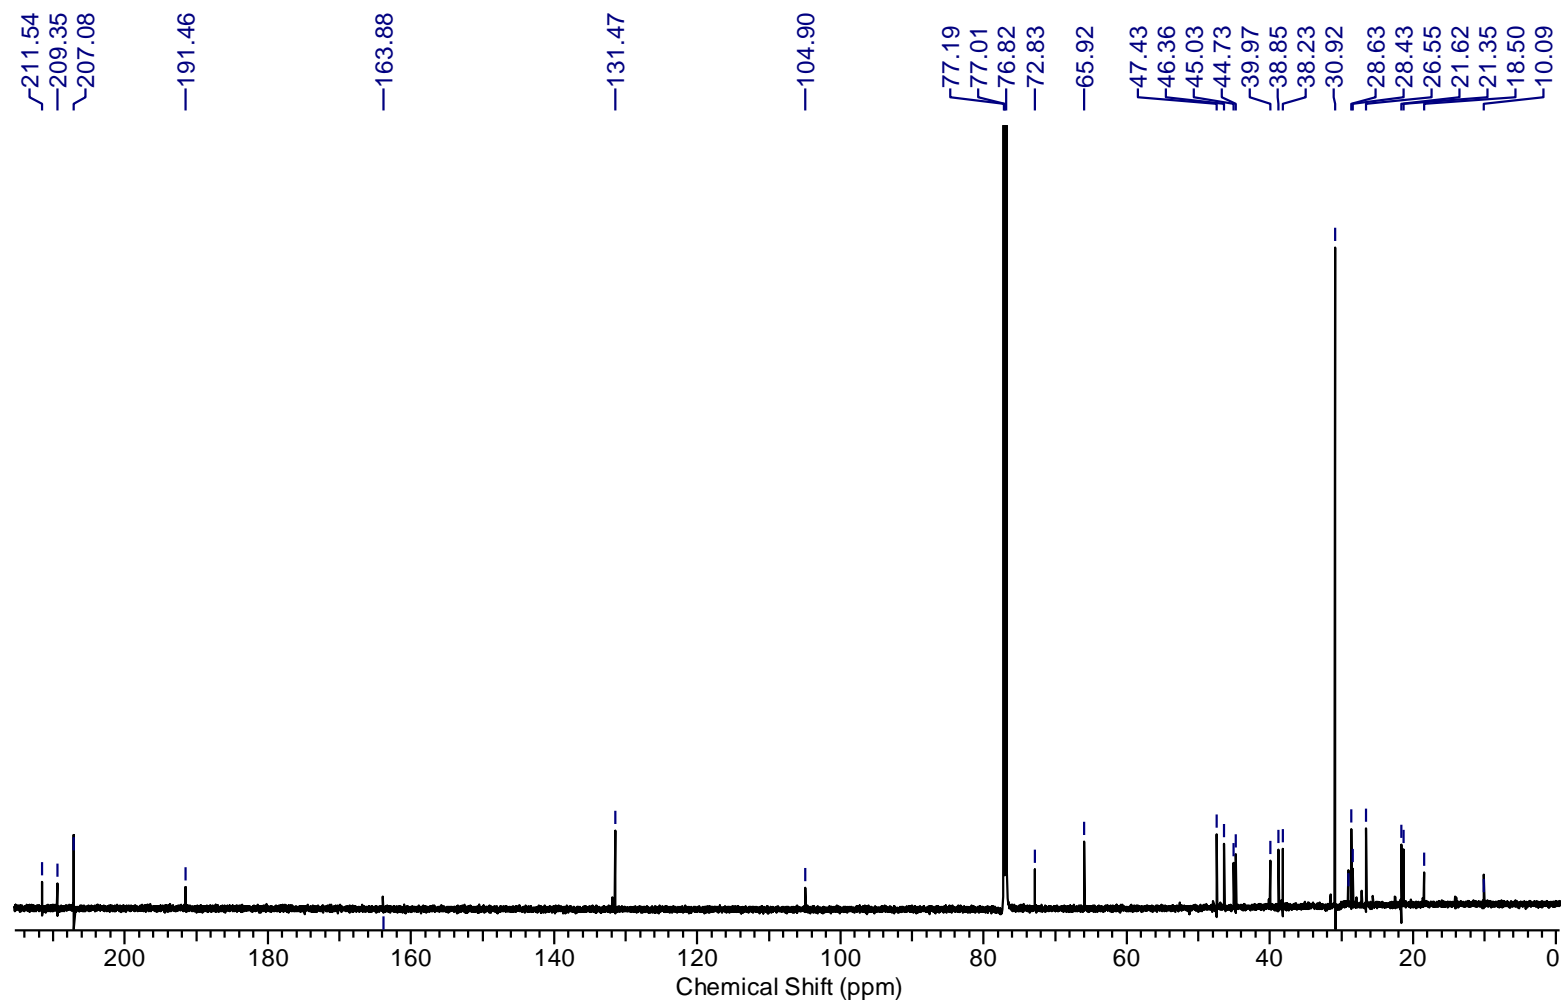

Figure S10: <sup>13</sup>C NMR (500 MHz, CDCl<sub>3</sub>) spectrum of simplicilone B (2)

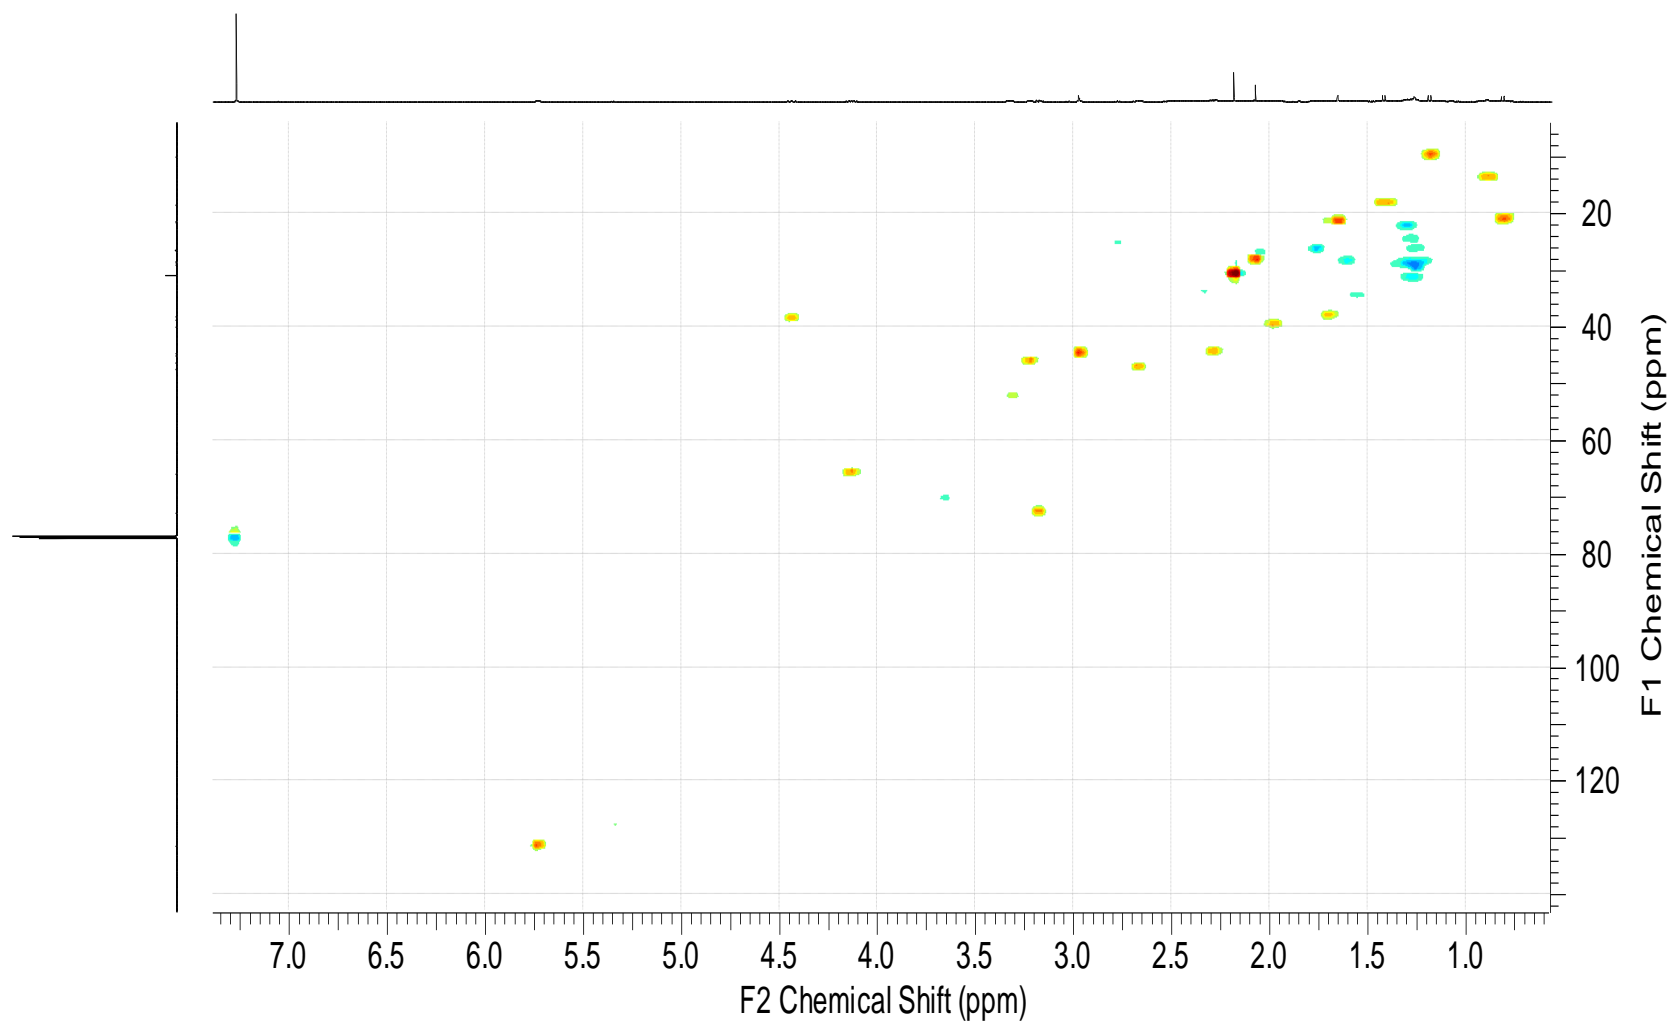

**Figure S11:** HSQC spectrum of simplicilone B (2)



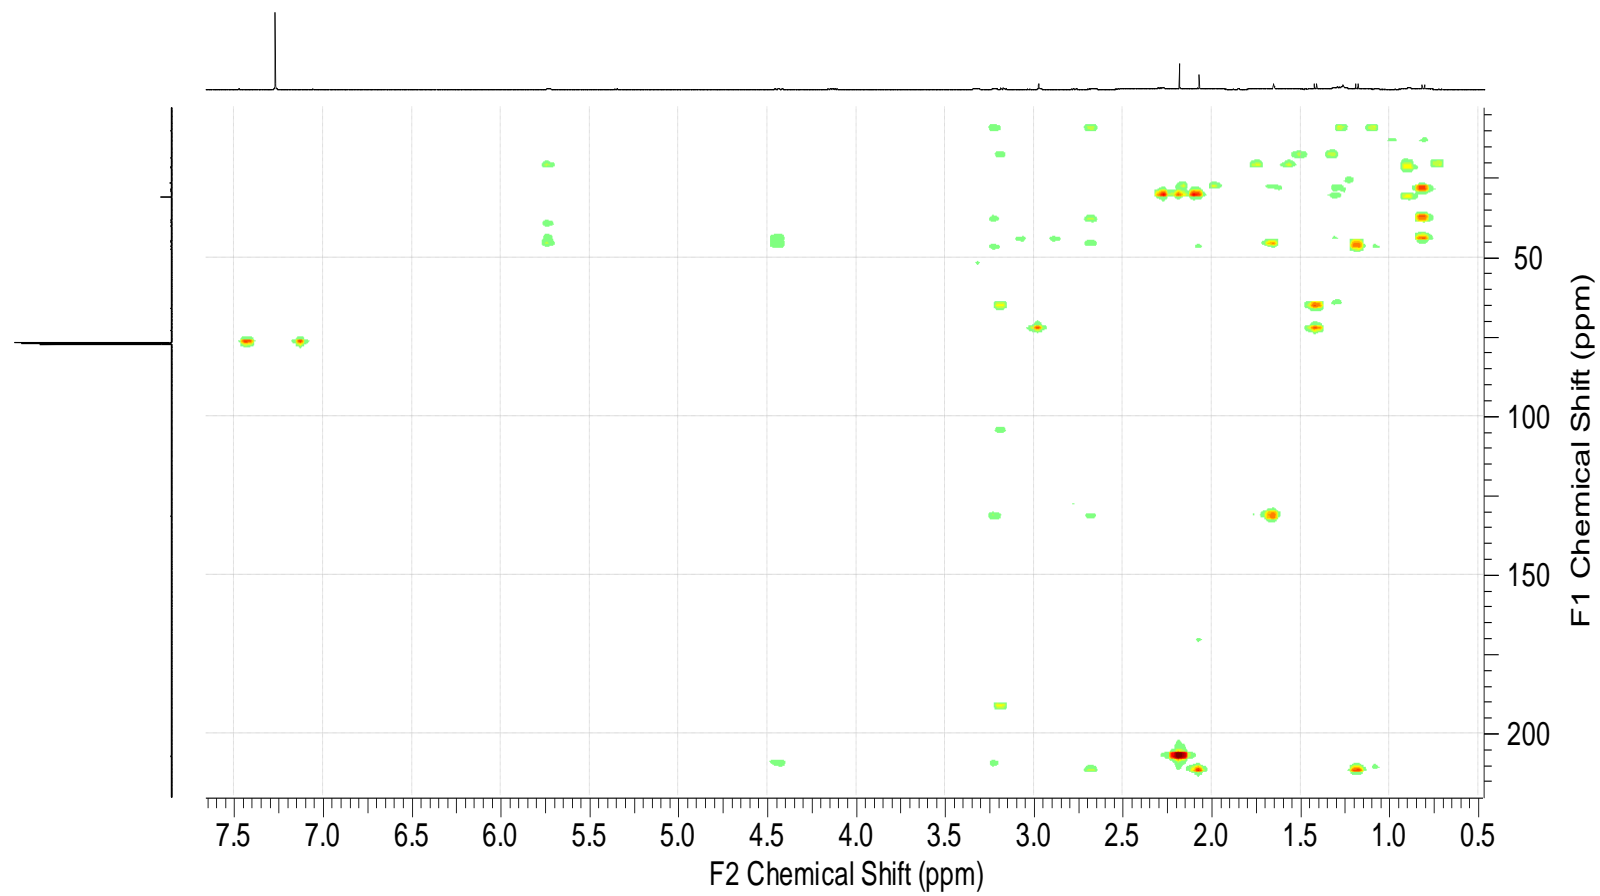

Figure S12: HMBC spectrum of simplicilone B (2)

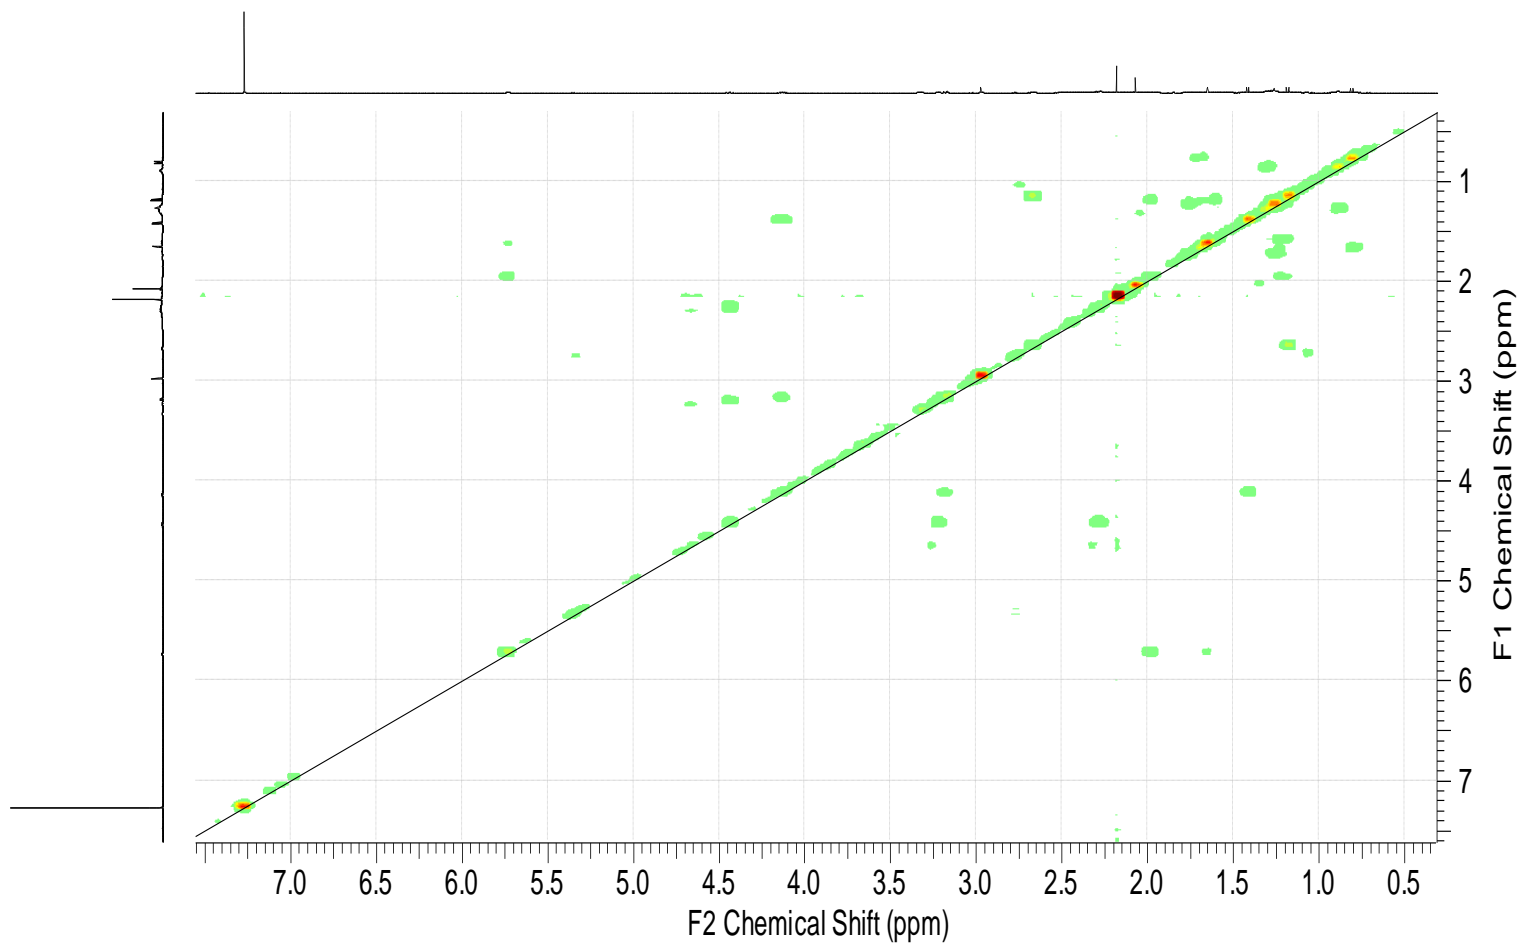

**Figure S13:** COSY spectrum of simplicilone B (2)

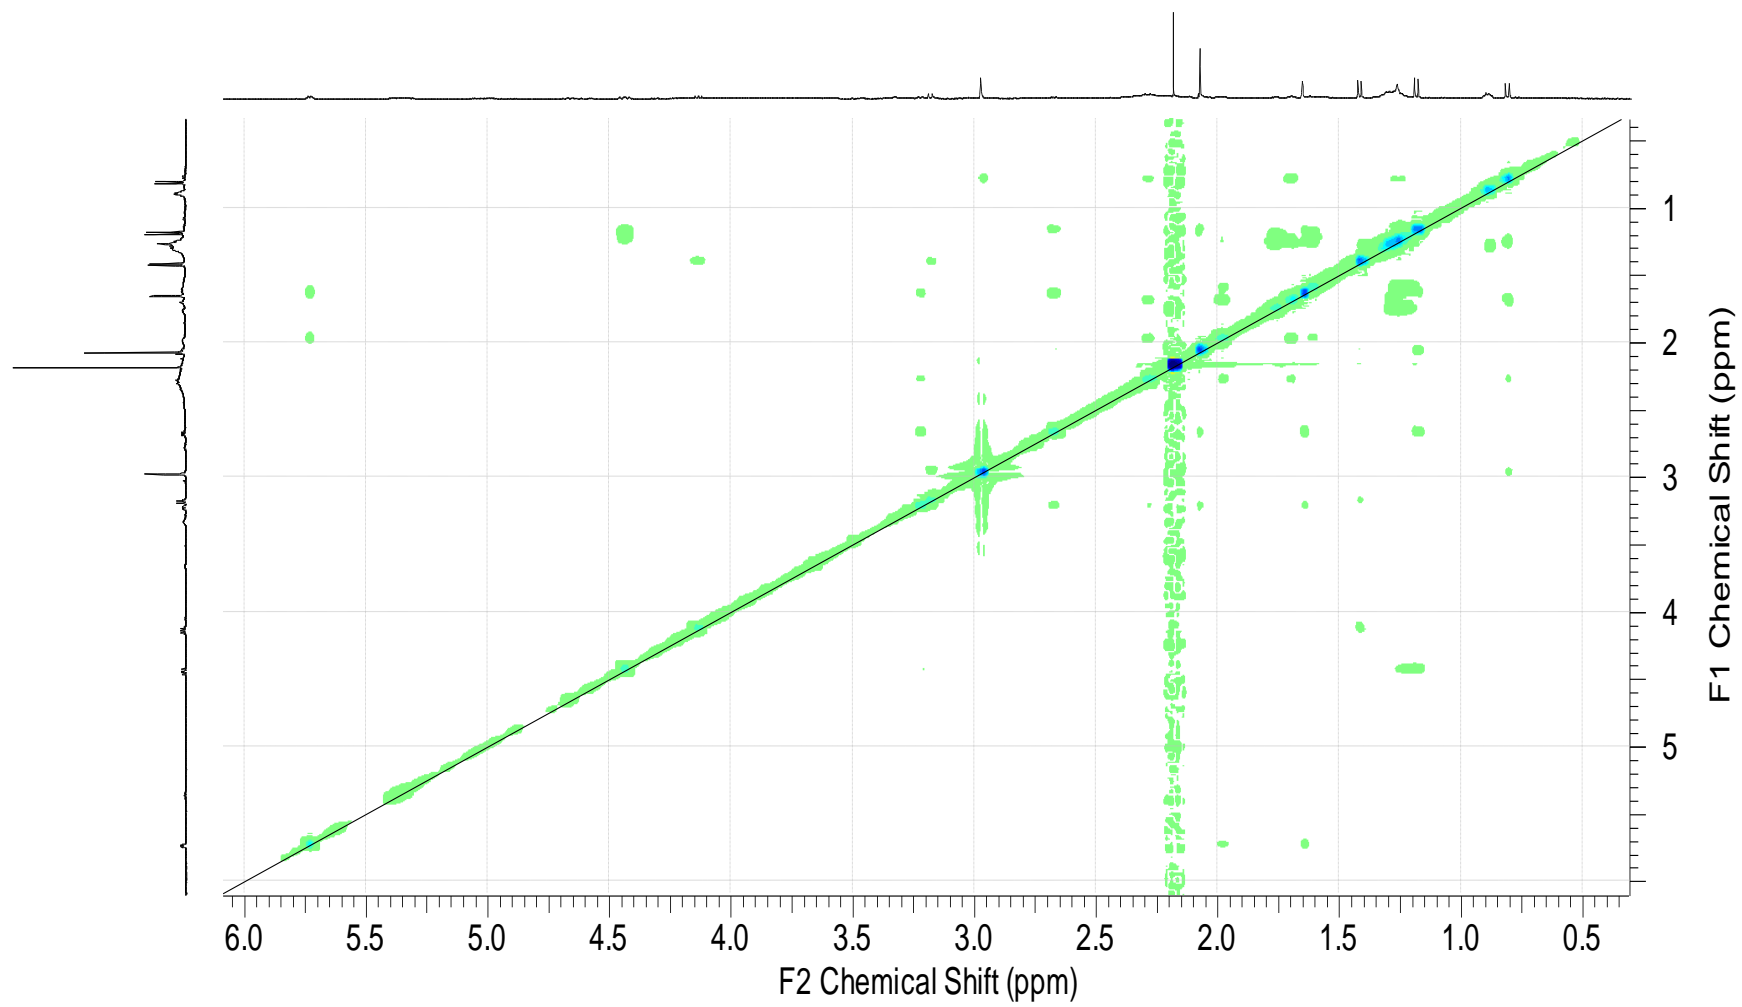

Figure S14: ROESY spectrum of simplicilone B (2)

## **References**

Altschul SF, Gish W, Miller W, Myers, EW, Lipman DJ. (1990) Basic local alignment search tool. *J. Mol. Biol.* 215:403-410.

Gardes M, Bruns TD (1993) ITS primers with enhanced specificity for basidiomycetes – application to the identification of mycorrhizae and rusts. *Mol Ecol* 2:113–118.

Kearse M, Moir R, Wilson A, Stones-Havas S, Cheung M, Sturrock S, Buxton S, Cooper A, Markowitz S, Duran C, Thierer T, Ashton B, Mentjies P, Drummond A (2012) Geneious basic: an integrated and extendable desktop software platform for the organization and analysis of sequence data. *Bioinformatics* 28:1647–1649.

Kuhnert E, Fournier J, Peršoh D, Luangsa-ard JJD, Stadler M (2014a) New Hypoxylon species from Martinique and new evidence on the molecular phylogeny of Hypoxylon based on ITS rDNA and  $\beta$ -tubulin data. *Fungal Divers.* 64:181–203.

White TJ, Bruns TD, Lee S, Taylor JW (1990) Amplification and direct sequencing of fungal ribosomal RNA for phylogenetics. In: Innis MA et al (eds) *PCR protocols: a guide to methods and applications*. Academic, San Diego, pp. 315–322.
